# Supplementary material for: Photo-active collagen systems with controlled triple helix architecture
Source: Royal Society of Chemistry journal article supplement (doi:10.1039/c3tb20720j), 2013-01-01
Supplement: c3tb20720j.pdf [file c3tb20720j.pdf]

## Supporting Information

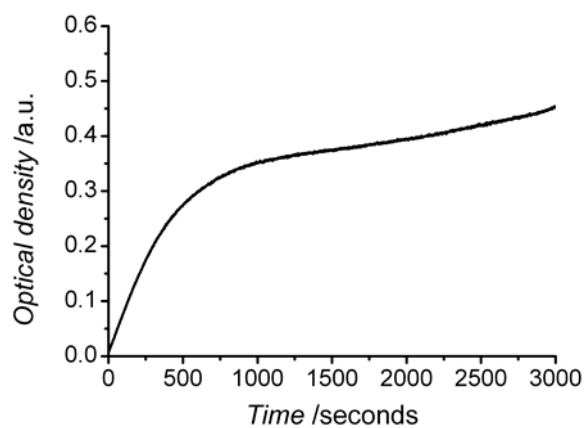

**Figure S1.** Change in optical density during CRT fibrillogenesis in pH 7.4 neutralized aqueous solution.
